# Supplementary material
Source: MDPI journal article supplement (https://www.mdpi.com/2673-9992/14/1/148)
Supplement: s1 [file s1]

# Synthesis of new purine nucleosides as potential metal chelators and anticholinesterase agents

Catarina Maria,<sup>1,2\*</sup> João Barros,<sup>1</sup> Nuno M. Xavier,<sup>1</sup> Karina Shimizu,<sup>1</sup> Adilson A. Freitas,<sup>1</sup> Maria J. Ferreira,<sup>1</sup> Ignazio Schino,<sup>3</sup> Mariangela Cantore,<sup>3</sup> Modesto

de Candia,<sup>3</sup> Nicola Colabufo,<sup>3</sup> José N. C. Lopes,<sup>1</sup> Amélia P. Rauter<sup>1</sup>

<sup>1</sup>Centro de Química Estrutural, Institute of Molecular Sciences, Faculdade de Ciências, Universidade de Lisboa, 1749-016 Lisboa and Instituto Superior Técnico, Universidade de Lisboa, 1049-001 Lisboa, Portugal

<sup>2</sup>NOVA University of Lisbon, Department of Chemistry, 2829-519 Caparica, Portugal

<sup>3</sup>Università degli Studi di Bari, Dipartimento di Farmacia-Scienze del Farmaco, Bari Italy

c.maria@campus.fct.unl.pt

## Background

Alzheimer's disease (AD) is the most common form of dementia, being a multifactorial neurodegenerative disease

**Elevated levels of Cu(II)**

Characteristic of both AD and some tumors

**Progressive decline of the level of the neurotransmitter acetylcholine**

Acetylcholine is degraded by acetylcholinesterase (AChE) or by butyrylcholinesterase (BChE)

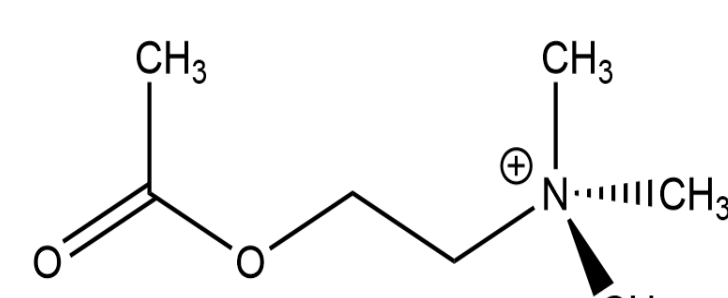

Figure 1. Structure of Acetylcholine

**Mannosylpurine nucleosides**

Mannosylpurines synthesized by our group already showed a potent BChE inhibition and a potent antitumor activity

## Methodology

### Synthesis

#### Method 1

Reaction of a fully protected glycoside with trimethylsilyl activated 6-benzoyladenine, catalyzed by trimethylsilyl triflate.

#### Method 2

Reaction of a fully protected phenyl  $\alpha$ -D-thiomannoside with 6-benzoyladenine in the presence of iodine.

### Chelating activity

Compounds **3-8**, **10**, **12**, **13** and **15** chelating activity was evaluated by recording UV-Visible spectra, since this method offers the advantage of high sensitivity towards small changes that affect electronic properties of ligand receptors.

### Anticholinesterase assays

Test compounds were assayed for the inhibitory activity towards electric eel AChE (*ee*AChE) and horse serum BChE (*eq*BChE) by using Ellman's colorimetric assay. Inhibition by **3-8** and **10** was tested at 20  $\mu$ M final concentration. However, **12** and **13** were tested at 5  $\mu$ M due to poor water solubility. Compound **15** was not tested yet.

## Method 1- Results

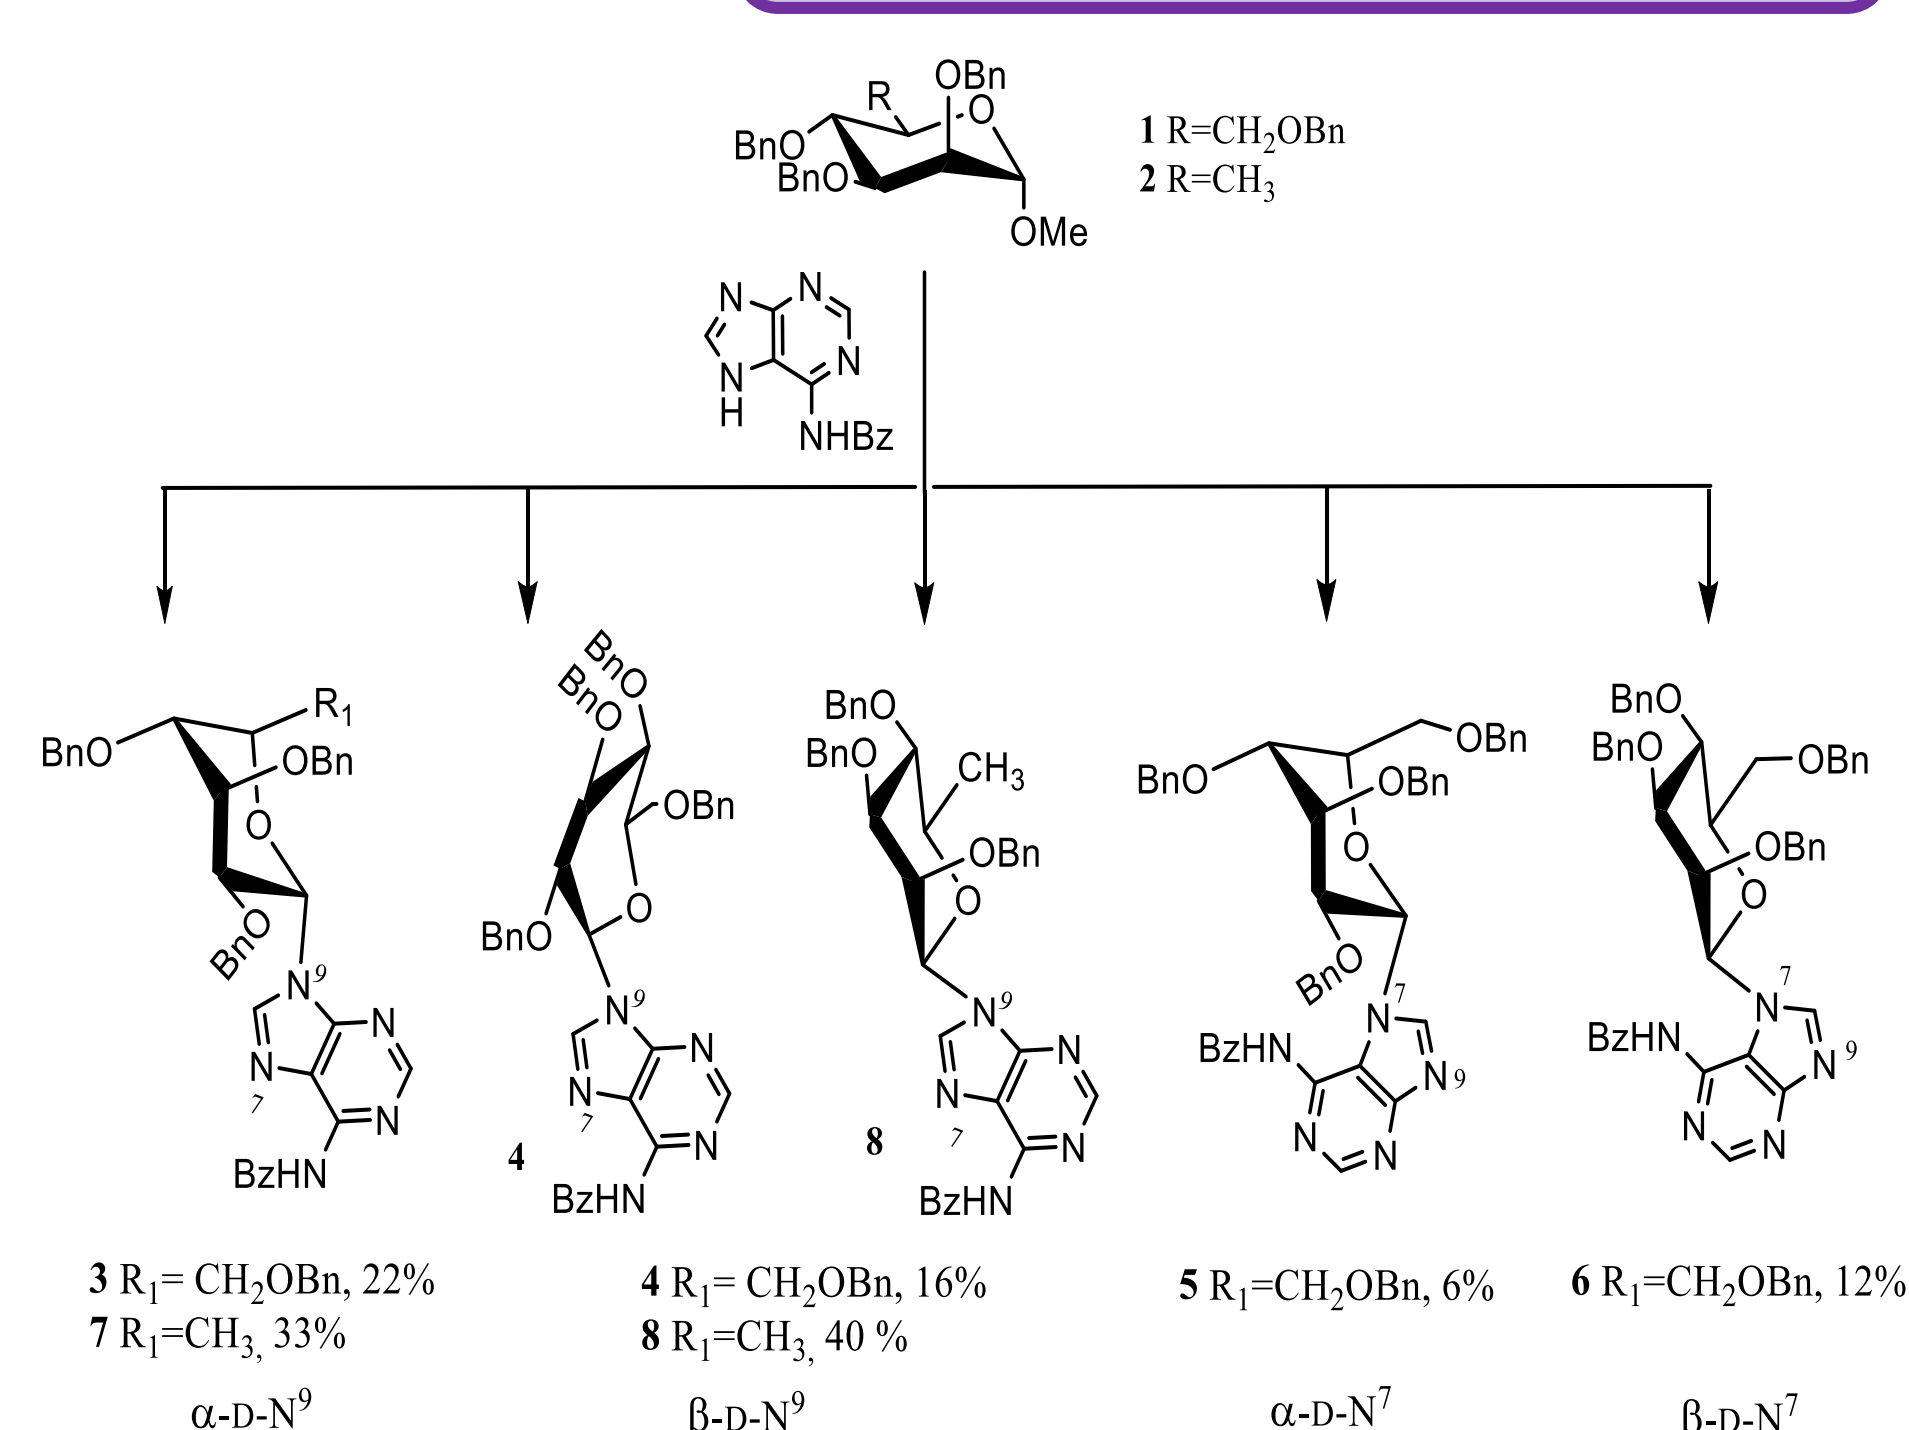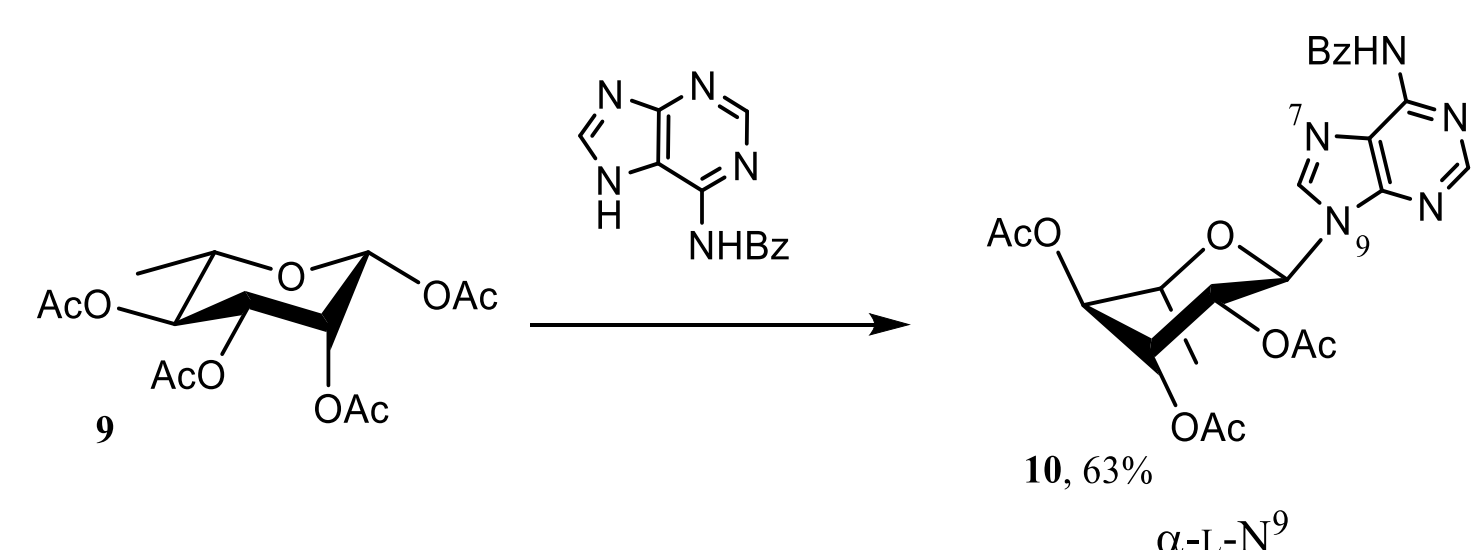

**Scheme 2.** Reaction of peracetylated  $\alpha$ -L-rhamnose with 6-benzoyladenine by Method 1.

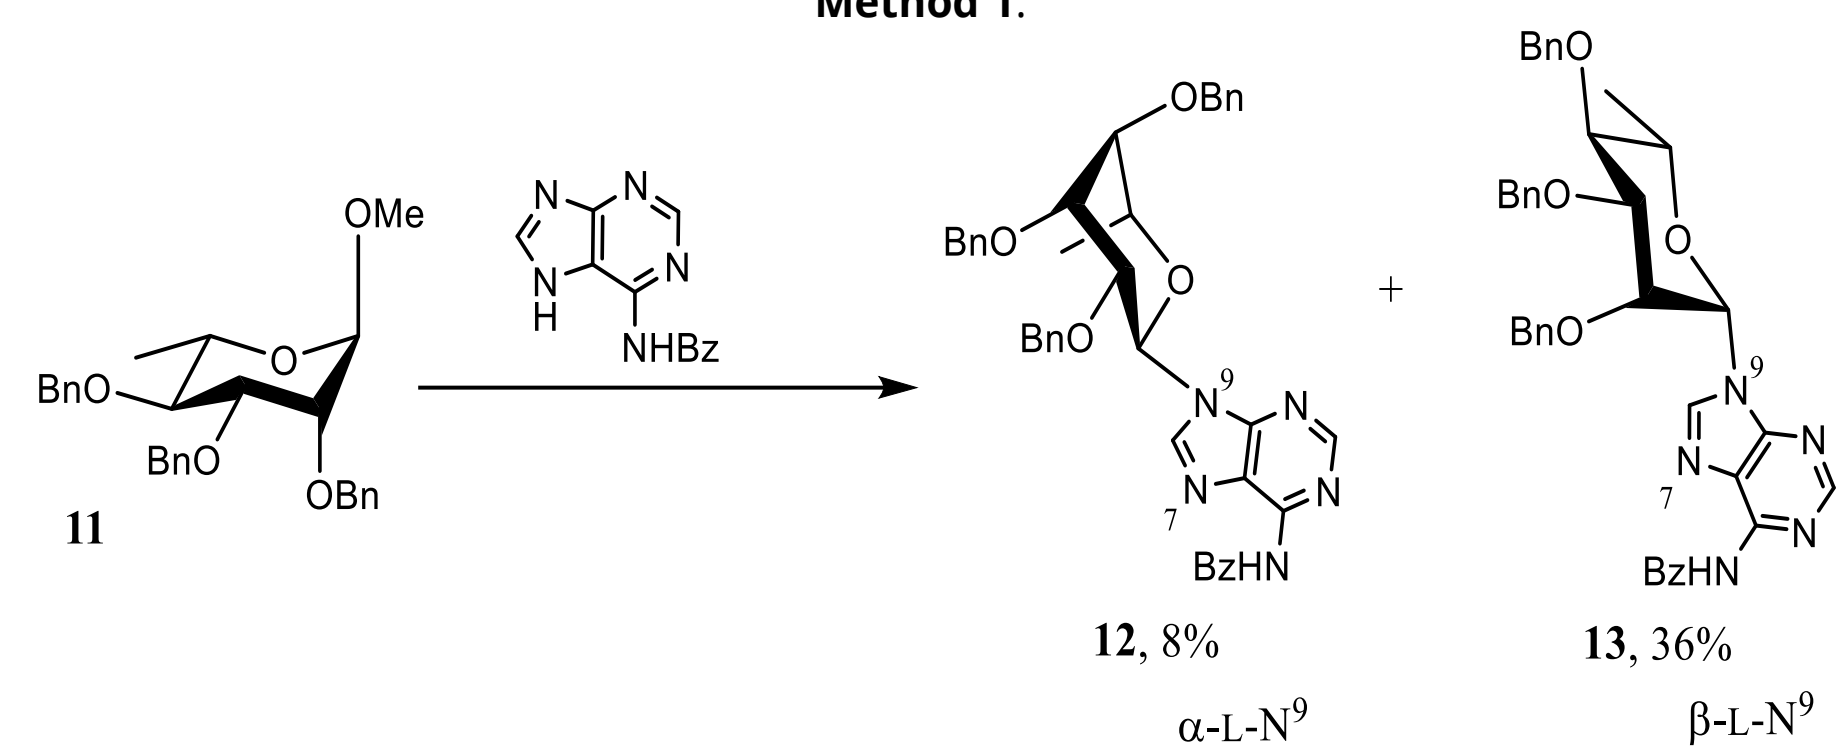

**Scheme 3.** Reaction of benzylated methyl  $\alpha$ -L-rhamnoside with 6-benzoyladenine by Method 1.

## Method 2- Results

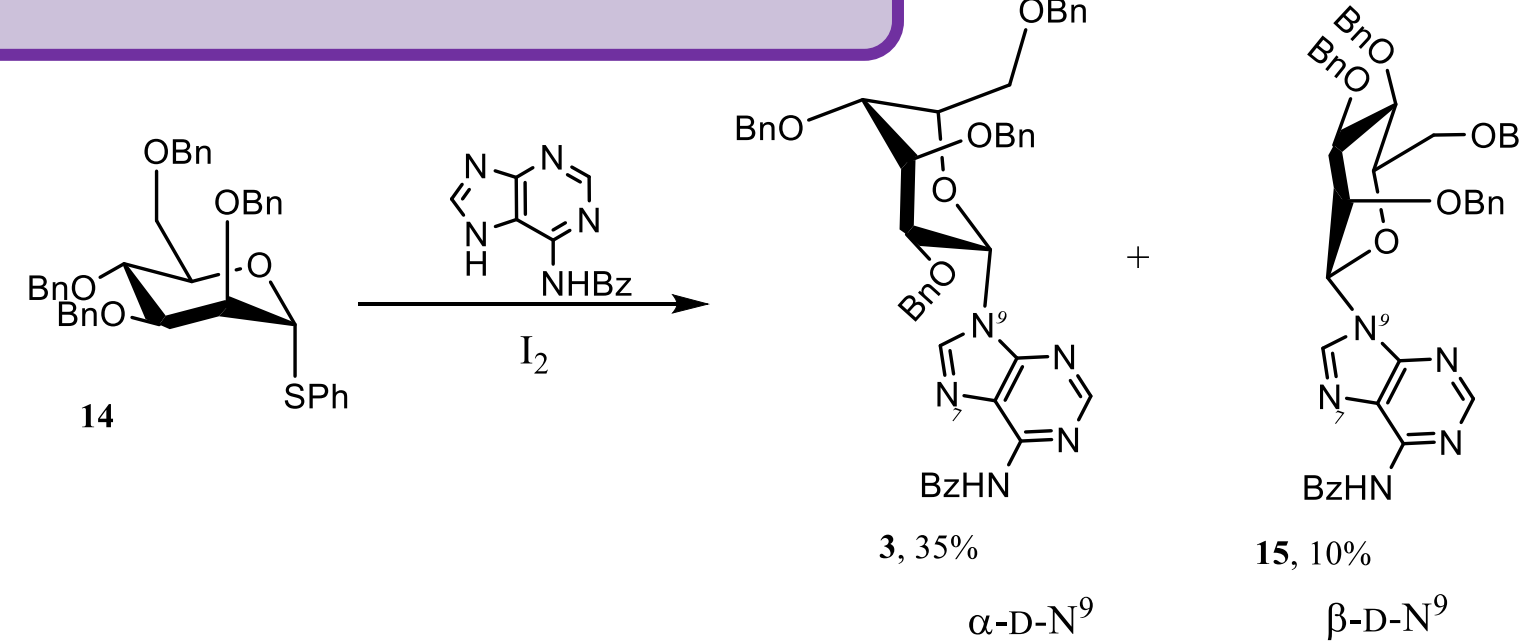

**Scheme 4.** Reaction of benzylated phenyl  $\alpha$ -D-thiomannoside with 6-benzoyladenine by Method 2.

## Chelating activity

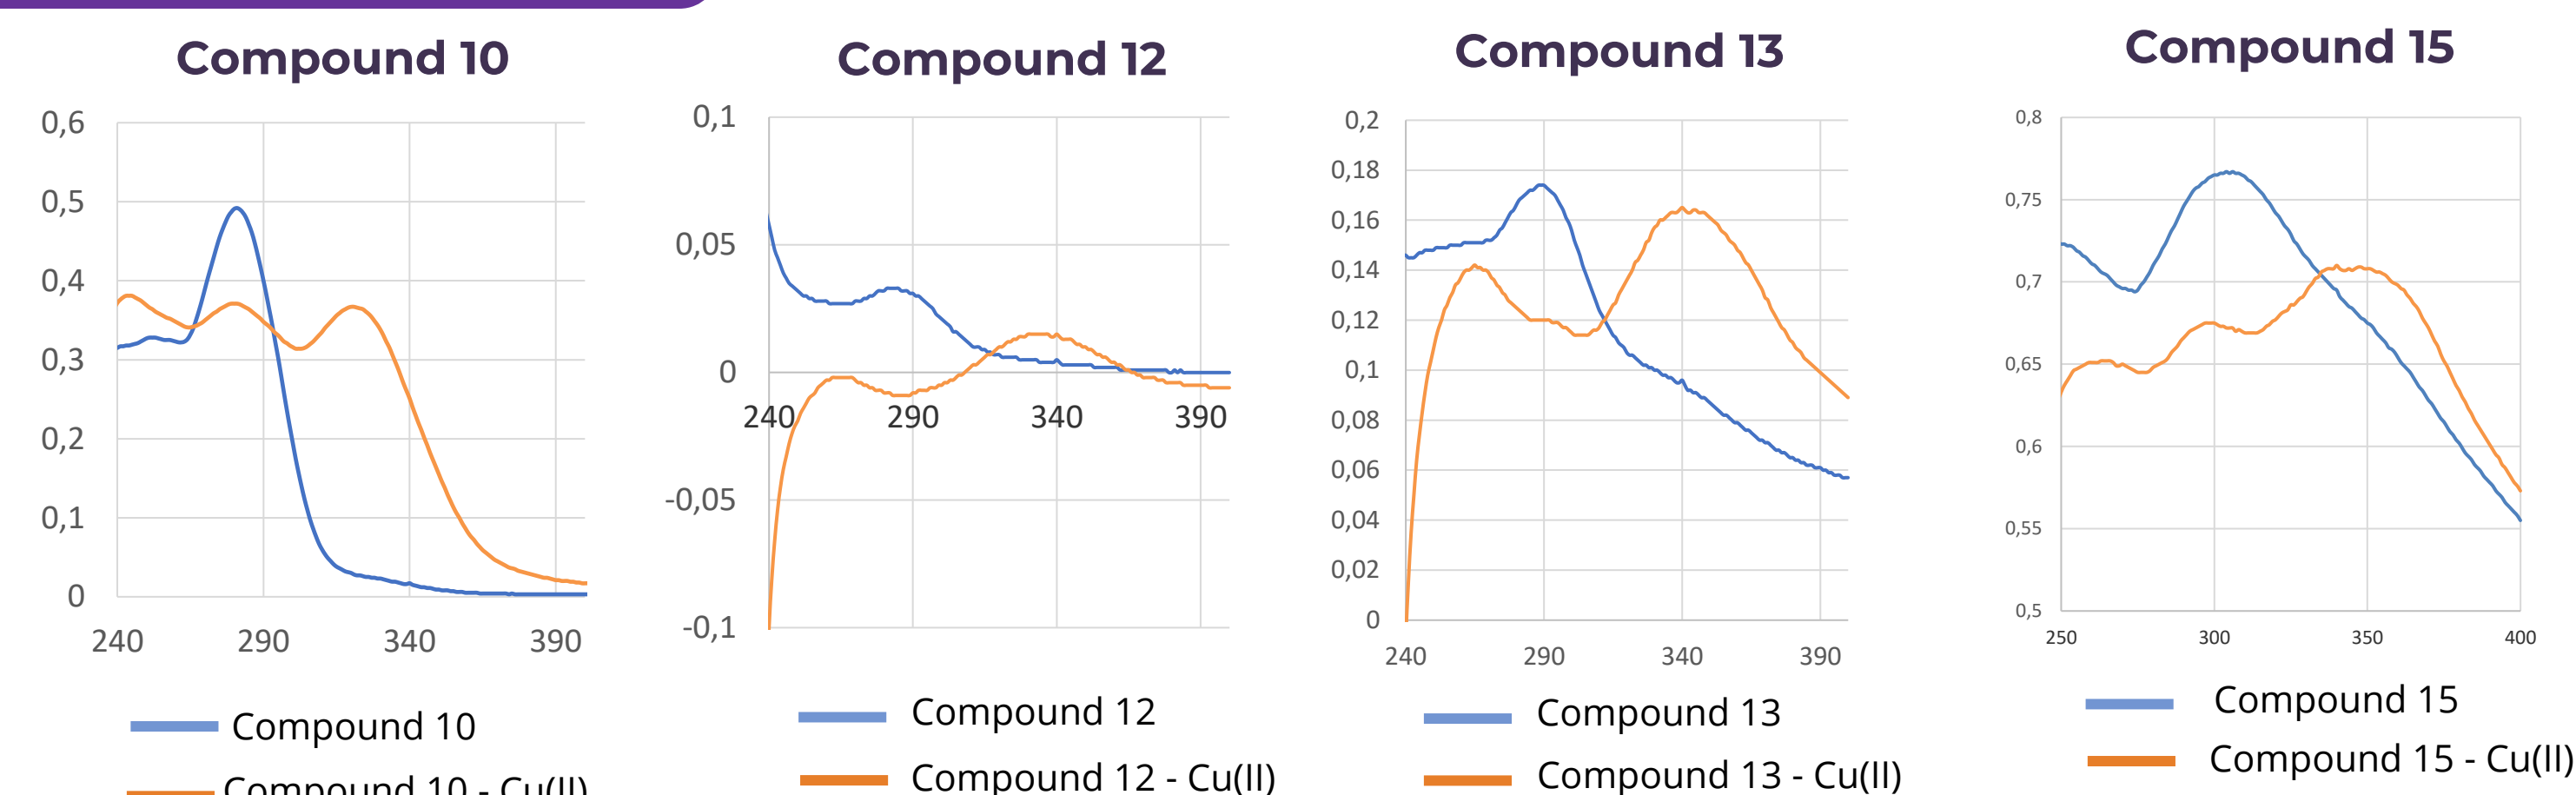

Amongst all the new synthesized compounds **10**, **12**, **13** and **15** showed the most interesting results. The resulting wavelength shifts indicate a conformational rearrangement induced by interaction with  $\text{Cu}(\text{II})$ .

## Anticholinesterase activity

Table 1. AChE and BChE inhibition by nucleosides **3-8**, **10**, **12** and **13**

| Compound nr. | IC <sub>50</sub> ( $\mu$ M) |                  |
|--------------|-----------------------------|------------------|
|              | <i>ee</i> AChE              | <i>eq</i> BChE   |
| 3            | >20                         | >20              |
| 4            | 10.60 $\pm$ 1.10            | 4.29 $\pm$ 1.70  |
| 5            | >20                         | 10.00 $\pm$ 1.10 |
| 6            | 2.61 $\pm$ 1.23             | 4.40 $\pm$ 1.30  |
| 7            | 4.69 $\pm$ 0.51             | >20              |
| 8            | 15.0 $\pm$ 2.1              | 11.7 $\pm$ 1.2   |
| 10           | >20                         | >20              |
| 12           | >5                          | >5               |
| 13           | >5                          | >5               |
| Donepezil    | 0.137                       | 1.50             |
| Galantamine  | 0.230                       | 11.9             |

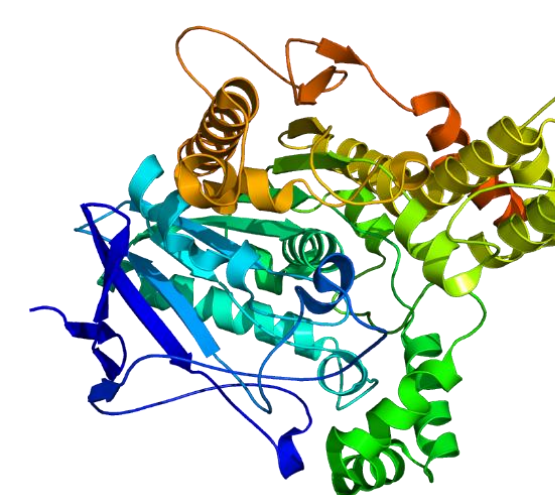

Figure 2. Structure of AChE

Compounds **4**, **6-8**, show IC<sub>50</sub> below 15  $\mu$ M.

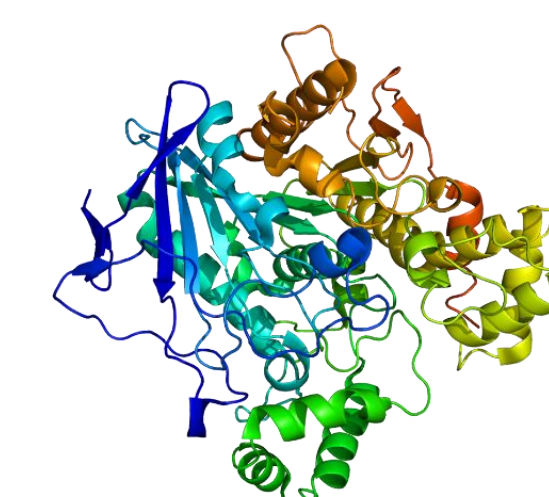

Figure 3. Structure of BChE

## Conclusions

### Selectivity

- Although method 1 did not allow us to obtain N<sup>9</sup> or N<sup>7</sup> selectivity for mannosides, the second method gave only N<sup>9</sup> isomers.
- By using method 1 with rhamnosides, it was possible to obtain N<sup>9</sup> selectivity.

### Copper chelation studies

- Since only compounds **10**, **12**, **13** and **15** showed chelating activity, therefore N<sup>9</sup> purine ligation might be relevant to optimize chelating activity.

### Anticholinesterase activity

- Compounds that exhibit  $\beta$ -D configuration are dual inhibitors, regardless of N<sup>9</sup> or N<sup>7</sup> purine ligation.
- AChE inhibition seems to be related with N<sup>9</sup> ligation while BChE inhibition seems to be related with N<sup>7</sup> ligation.
- Aromatic rings seem to be important for anticholinesterase activity.

## ACKNOWLEDGMENTS

Fundação para a Ciência e Tecnologia is gratefully acknowledge for the support of Centro de Química Estrutural through project UIDB/00100/2020 and Institute of Molecular Sciences through project LA/P/0056/2020.

## REFERENCES

- [1] K. Sharma, *Molecula Medicine Reports* 2019, 20, 1479-1487
- [2] E. Tamagno, *et. al*, *Antioxidants* 2021, 10, 1479
- [3] Q. Li, *et. al*, *European Journal of Medicinal Chemistry* 2018, 158, 463-477
- [4] H. Hampel, *et. al*, *The Journal of Prevention of Alzheimer's Disease* 2019, 6, 2-15
- [5] S. Schwarz, *et. al*, *Organic and Biomolecular Chemistry* 2014, 12, 2446-2456

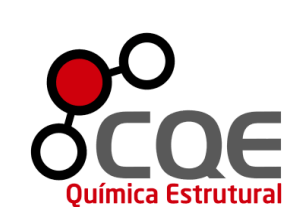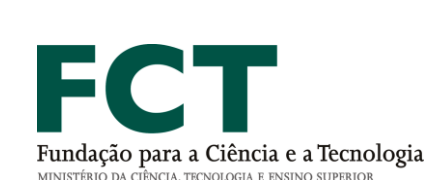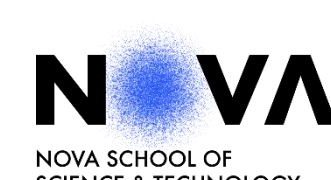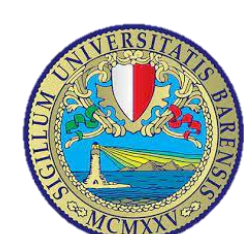

ECMC  
2022

The 8th International Electronic  
Conference on Medicinal Chemistry  
01-30 NOVEMBER 2022 | ONLINE
